# Supplementary material
Source: Springer Nature journal article supplement (https://www.springermedizin.de/resource/supplementary/12881_2010_726_MOESM3_ESM.pdf/9450968)
Supplement: MOESM3 [file 9450968]

| SNP       | III:2 |   | IV:1 |   | IV:2 |   | IV:3 |   | IV:4 |   | IV:5 |   | III:5 |   | IV:6 |   | III:6 |   | III:9 |   | IV:7 |   | IV:8 |   | IV:9 |   |
|-----------|-------|---|------|---|------|---|------|---|------|---|------|---|-------|---|------|---|-------|---|-------|---|------|---|------|---|------|---|
| rs580309  | C     | T | T    | ? | C    | T | T    | T | C    | T | C    | T | C     | C | C    | C | C     | T | ?     | ? | C    | T | C    | C | ?    | ? |
| rs718206  | T     | A | A    | ? | T    | A | A    | A | T    | A | T    | T | T     | T | T    | A | T     | A | T     | A | T    | A | T    | A | A    | A |
| rs720035  | T     | T | T    | ? | T    | C | T    | C | T    | C | T    | C | T     | C | C    | T | T     | T | T     | T | T    | C | T    | C | T    | T |
| rs1416464 | C     | T | T    | T | C    | T | T    | T | C    | T | C    | T | C     | T | T    | C | C     | C | C     | C | C    | C | C    | T | C    | T |
| rs213036  | C     | T | T    | C | C    | T | T    | T | C    | C | C    | T | C     | T | T    | T | C     | T | C     | T | C    | T | C    | T | T    | T |
| rs1441834 | G     | G | G    | G | G    | G | G    | G | G    | A | G    | A | G     | A | A    | A | G     | G | A     | A | A    | A | A    | G | A    | G |
